# Supplementary material for: Highly efficient pollutant removal of graphitic carbon nitride by the synergistic effect of adsorption and photocatalytic degradation
Source: Royal Society of Chemistry journal article supplement (doi:10.1039/c7ra11467b), 2018-01-01
Supplement: c7ra11467b1.pdf [file c7ra11467b1.pdf]

## Supporting Information

### **Highly efficient pollutants removal of graphitic carbon nitride by synergistic effect of adsorption and photocatalytic degradation**

Xueping Song, Qin Yang, Mengyun Yin, Dan Tang and Limei Zhou\*

Chemical Synthesis and Pollution Control Key Laboratory of Sichuan Province, China West Normal  
University, Nanchong 637002, Sichuan, China.

Corresponding Author:\*Tel: +86-817-2568081. E-mail: cwnuzhoulimei@163.com.

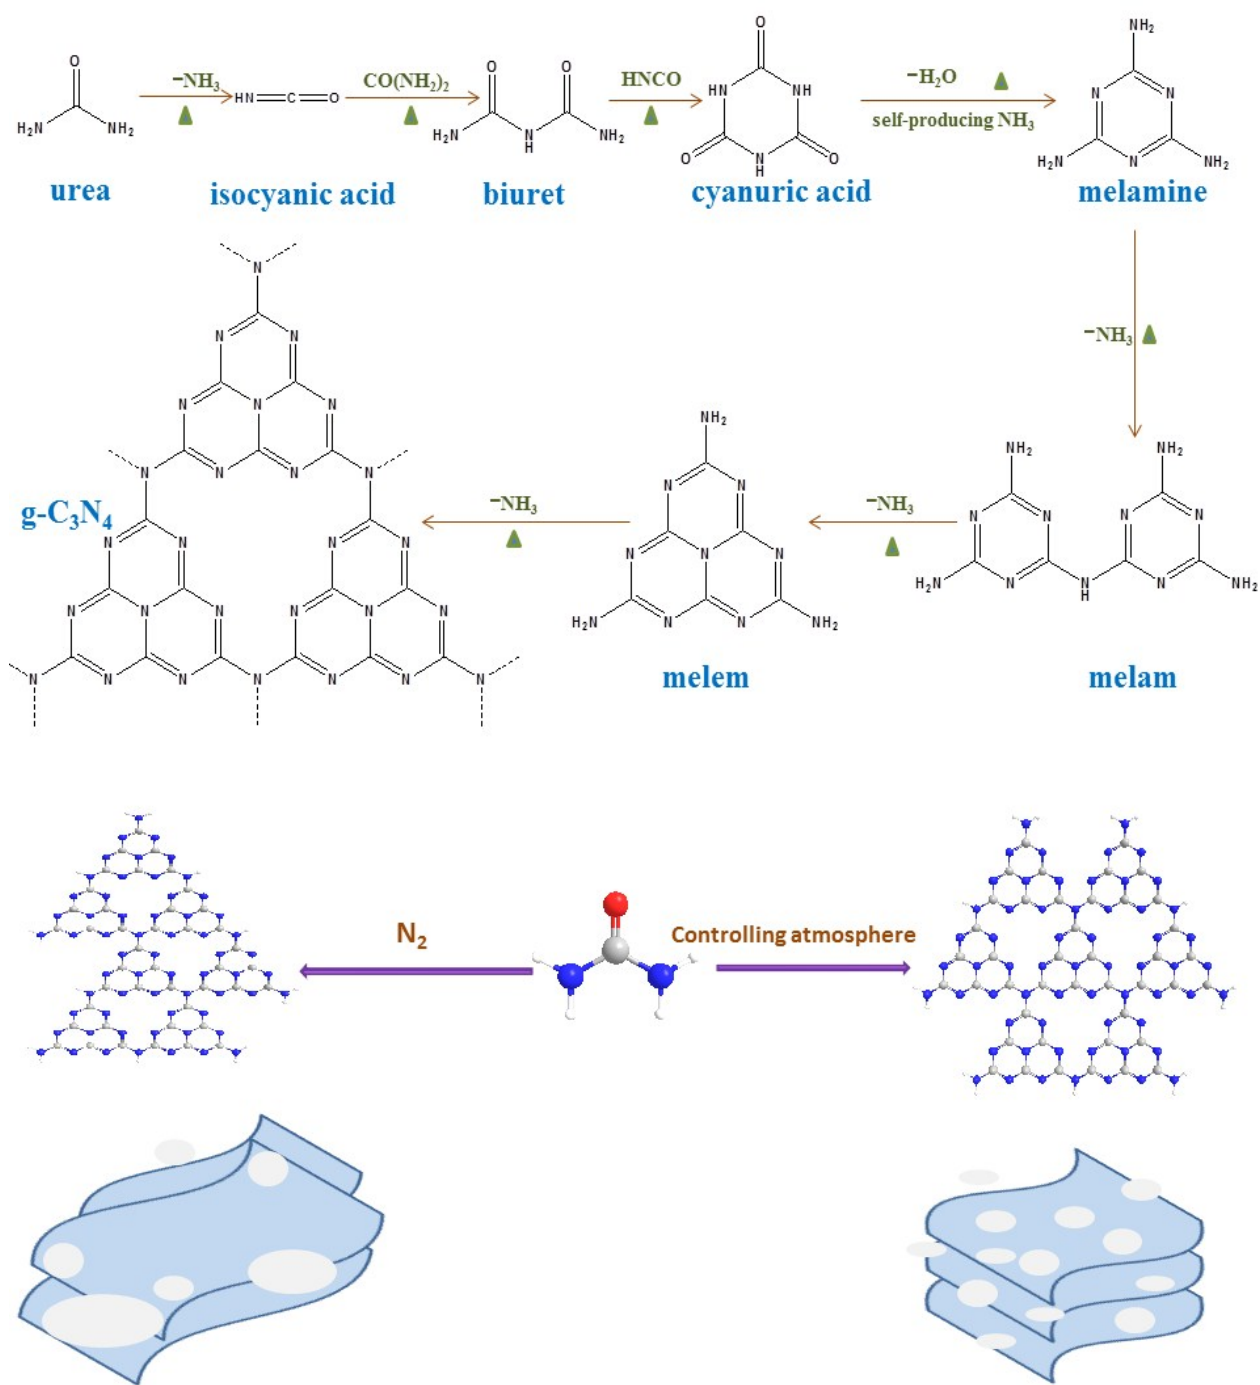

**Fig. S1.** Proposed mechanism of the reaction path for self-condensation of urea into g-C<sub>3</sub>N<sub>4</sub>.

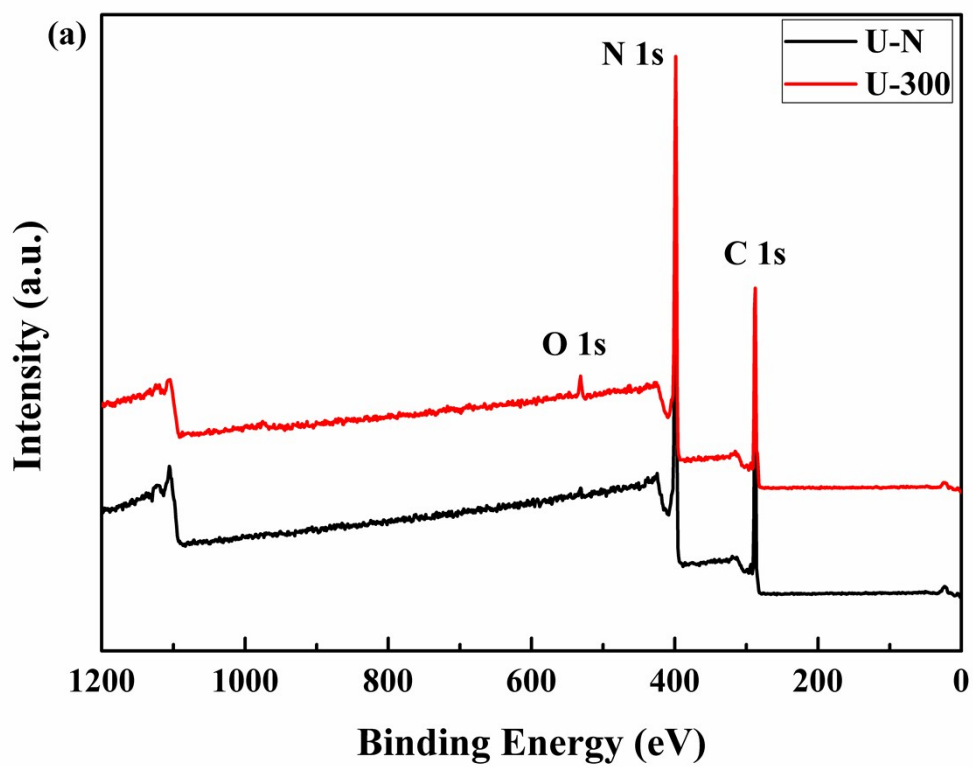

Fig. S2. XPS survey spectrum of different g-C<sub>3</sub>N<sub>4</sub> samples.

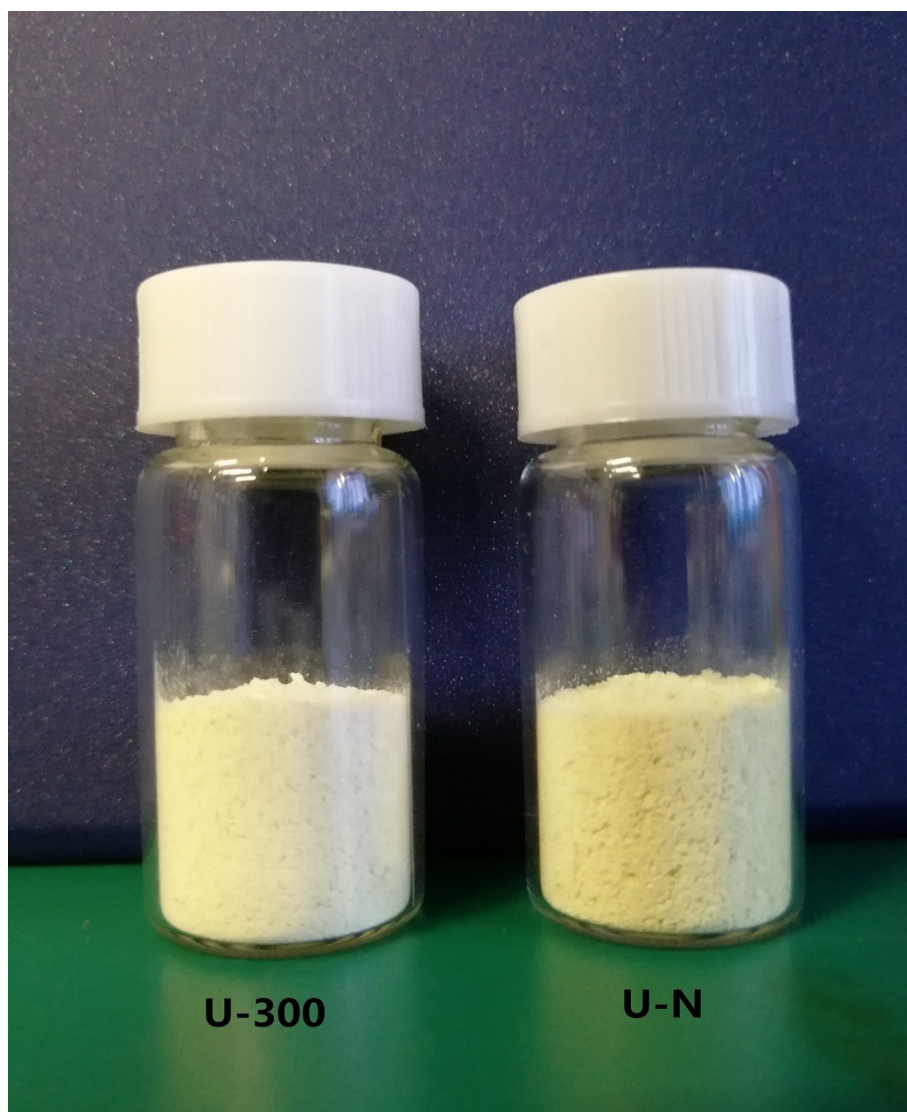

**Fig. S3.** Photograph of different  $g\text{-C}_3\text{N}_4$  samples.

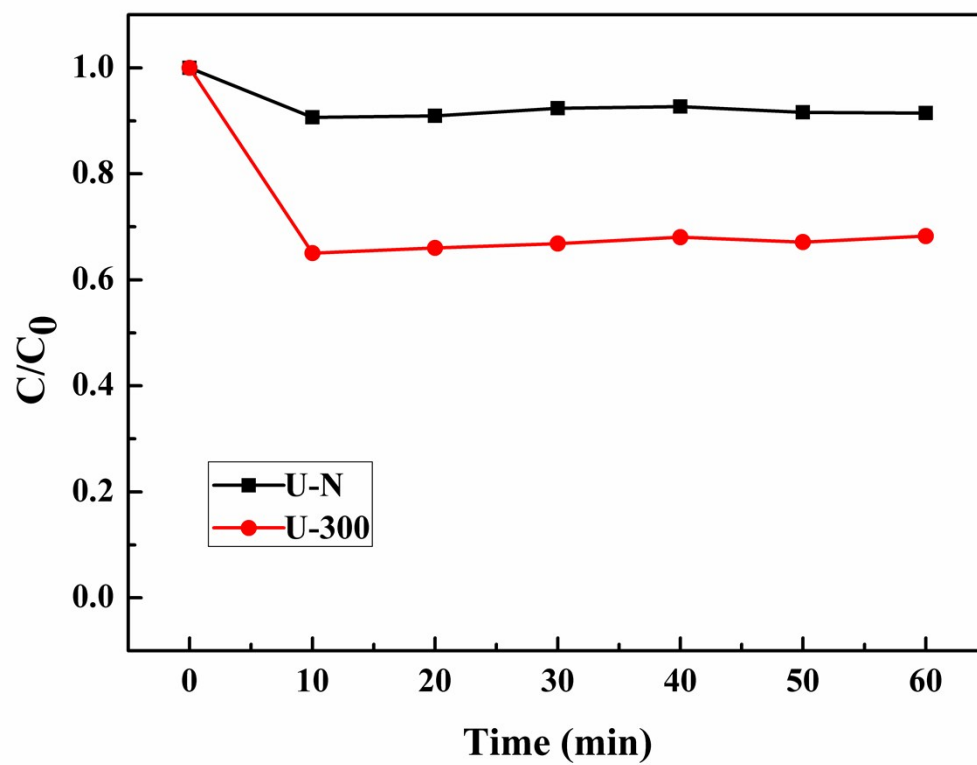

**Fig. S4.** Adsorption of RhB (10 mg/L, 50 mL) using different  $g-C_3N_4$  samples (25 mg) in dark.

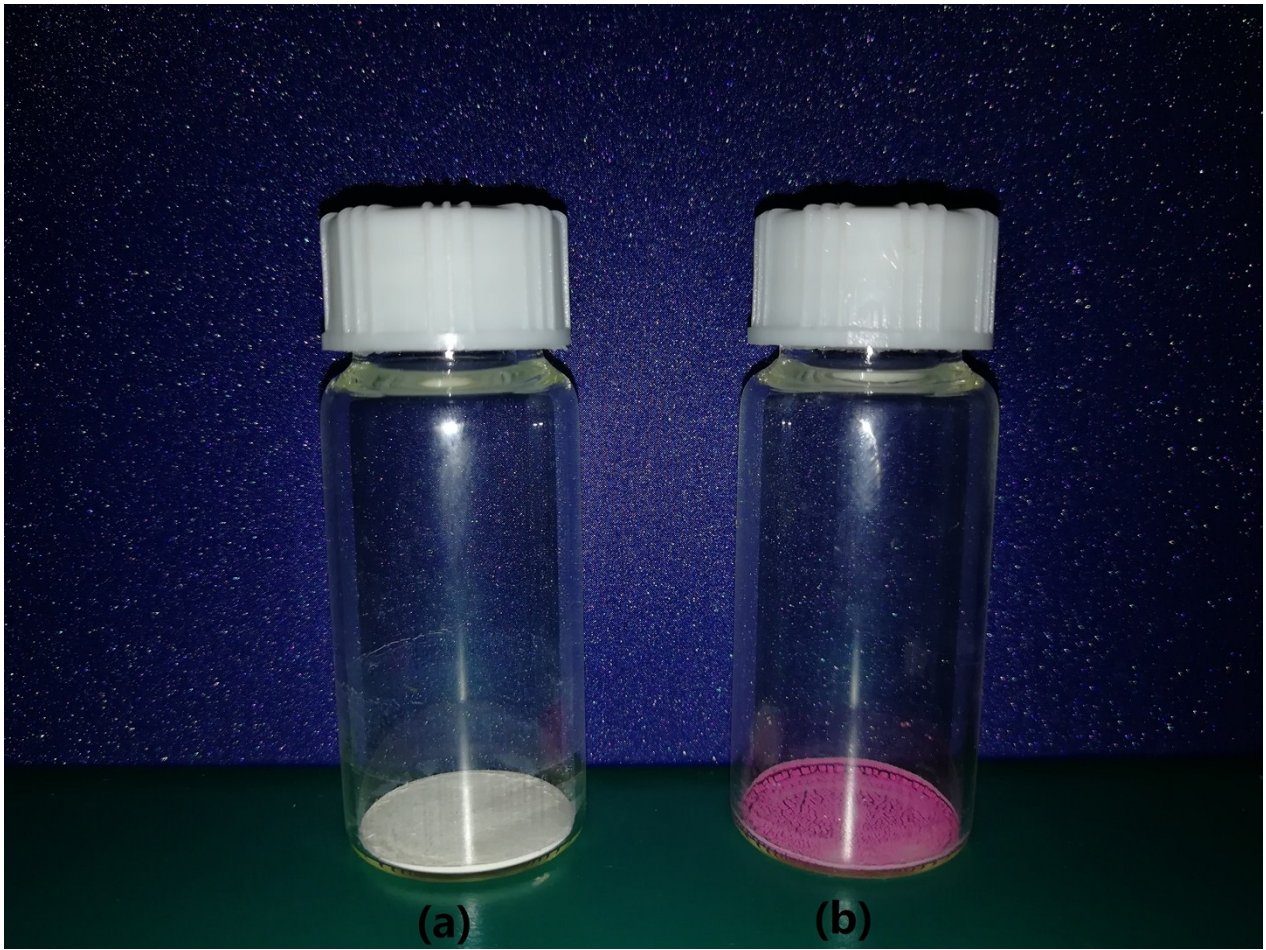

**Fig. S5.** Photograph of U-N (a) and U-300 (b) after adsorption of RhB.

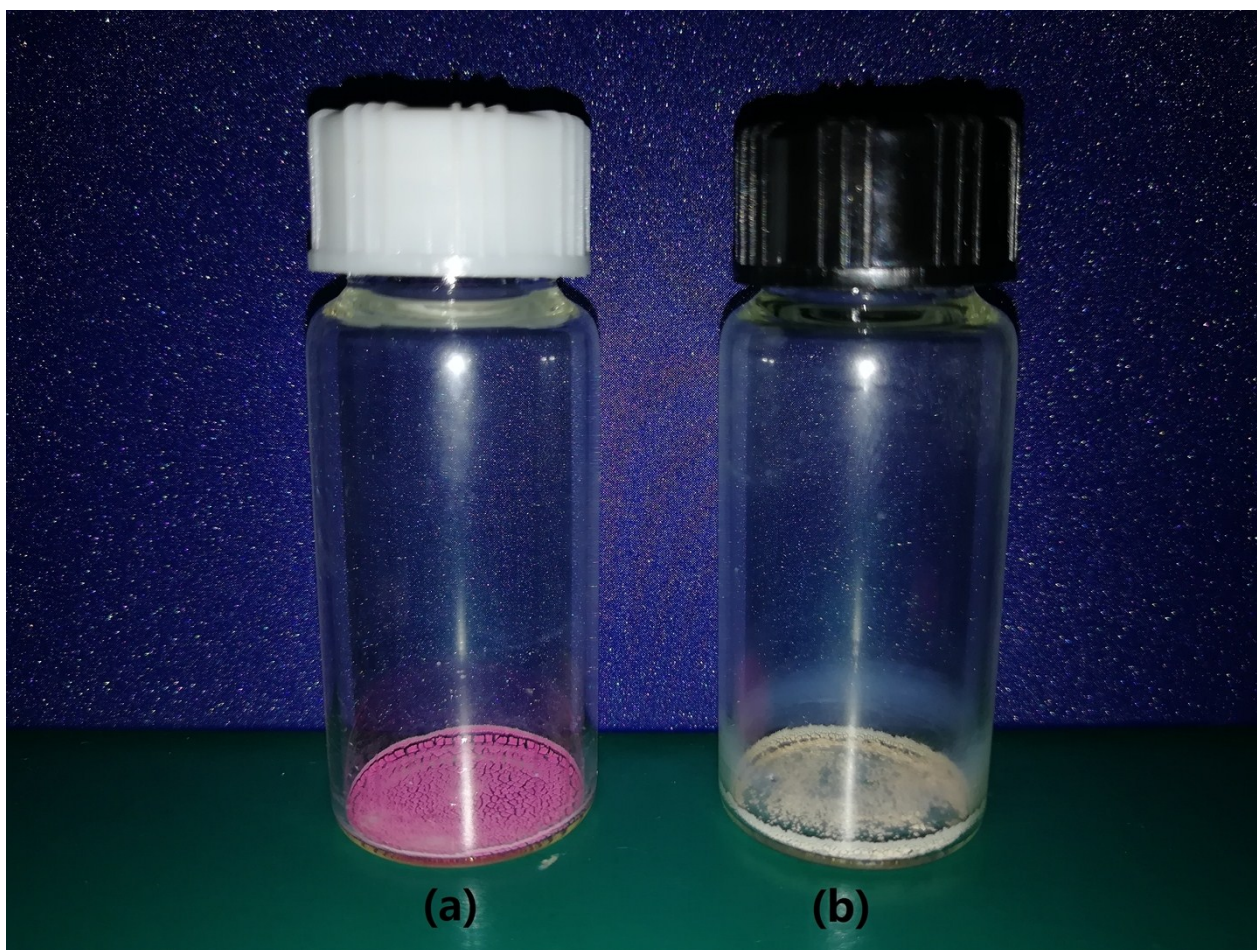

**Fig. S6.** Photograph of U-300 after adsorption (a) and degradation (b) of RhB.

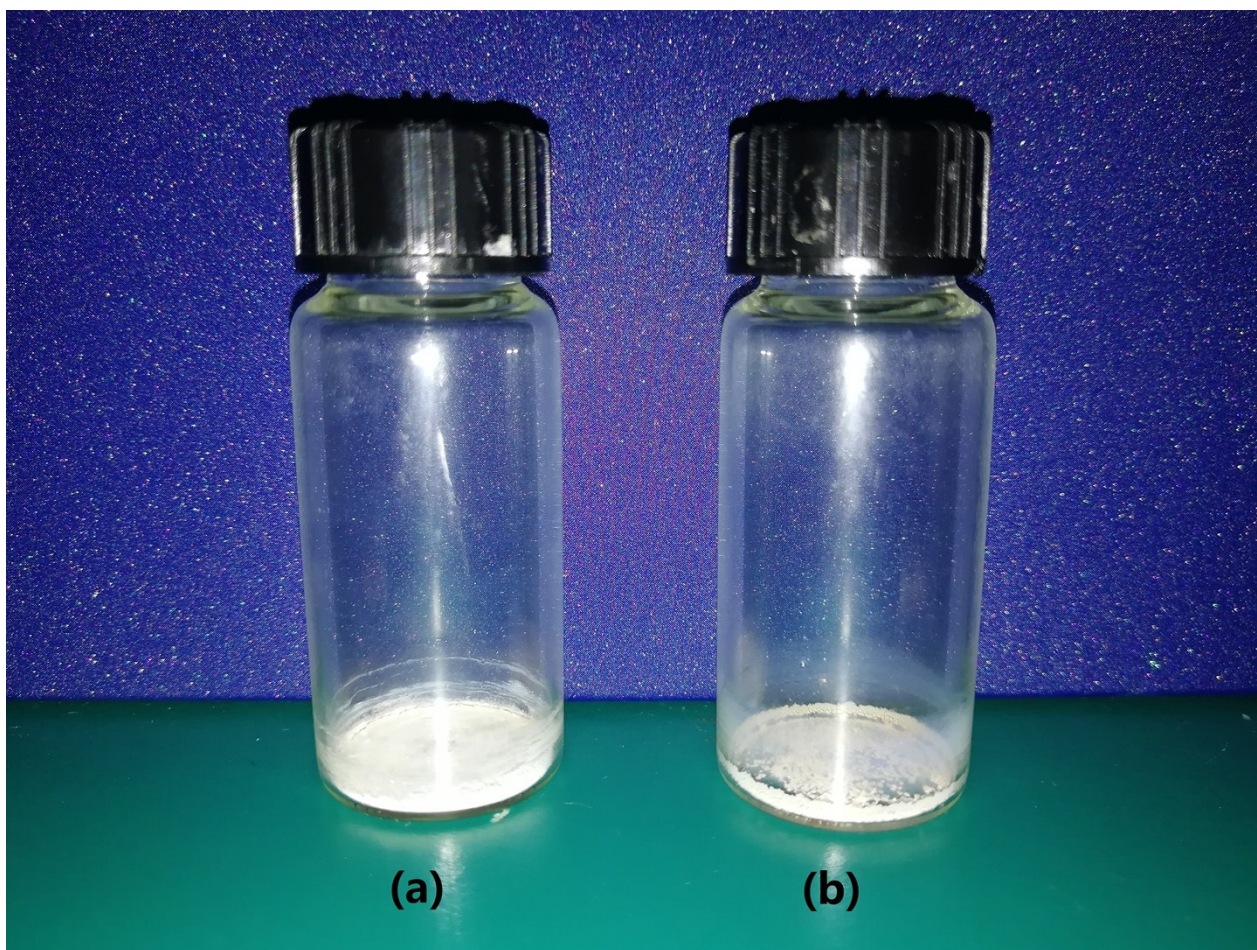

**Fig. S7.** Photograph of U-N (a) and U-300 (b) after degradation of RhB.



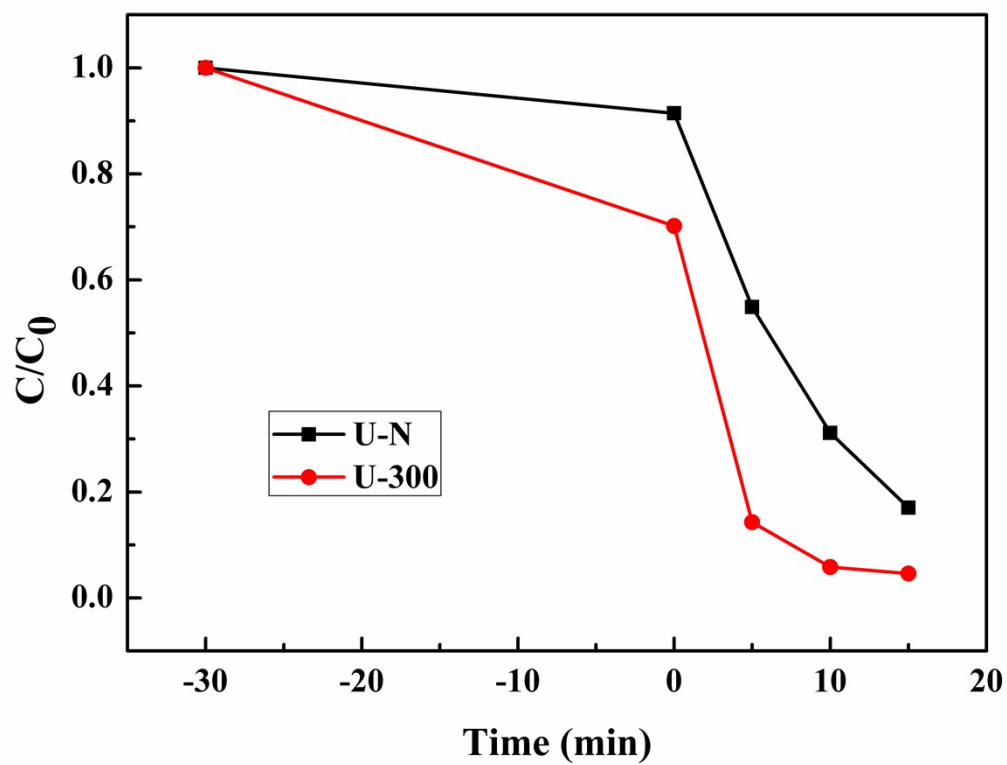

**Fig. S8.** Adsorption with photocatalytic degradation of RhB (5 mg/L, 50 mL) using different g- $C_3N_4$  samples (12.5 mg).

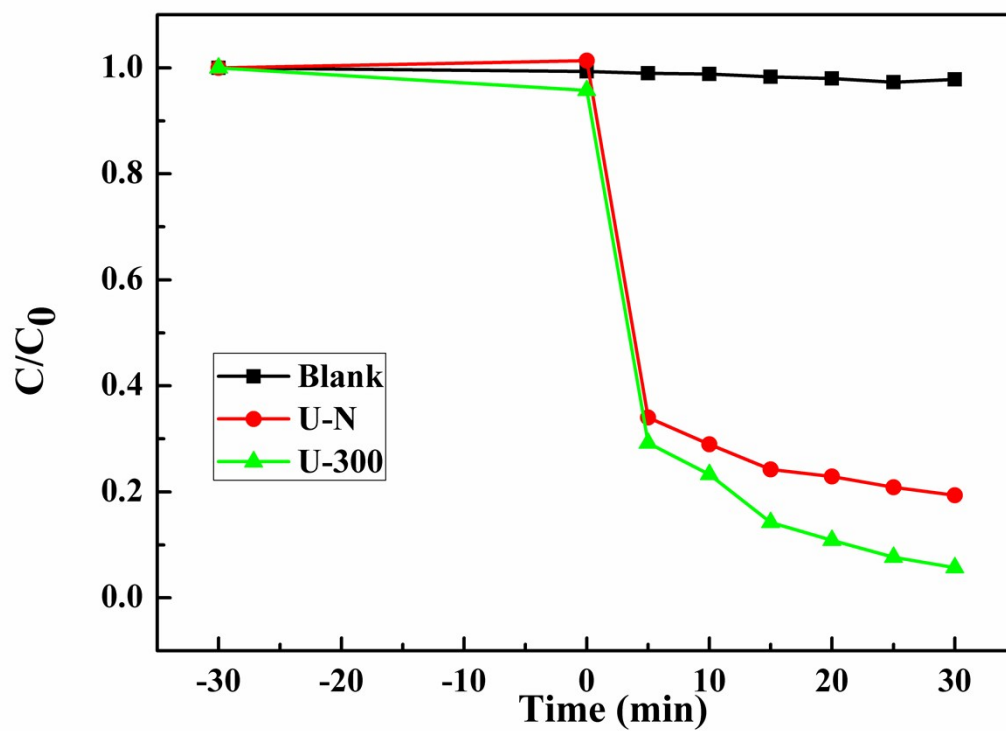

**Fig. S9.** Photocatalytic degradation of TC-HCl (20 mg/L, 50 mL) using different g-C<sub>3</sub>N<sub>4</sub> samples (25 mg).
